# Supplementary material for: Serological Surveillance Development for Tropical Infectious Diseases Using Simultaneous Microsphere-Based Multiplex Assays and Finite Mixture Models
Source: PubMed Central journal article supplement (PMC4117437; doi:10.1371/journal.pntd.0003040), 2014-07-31
Supplement: pntd.0003040.s001.pdf [file pntd.0003040.s001.pdf]

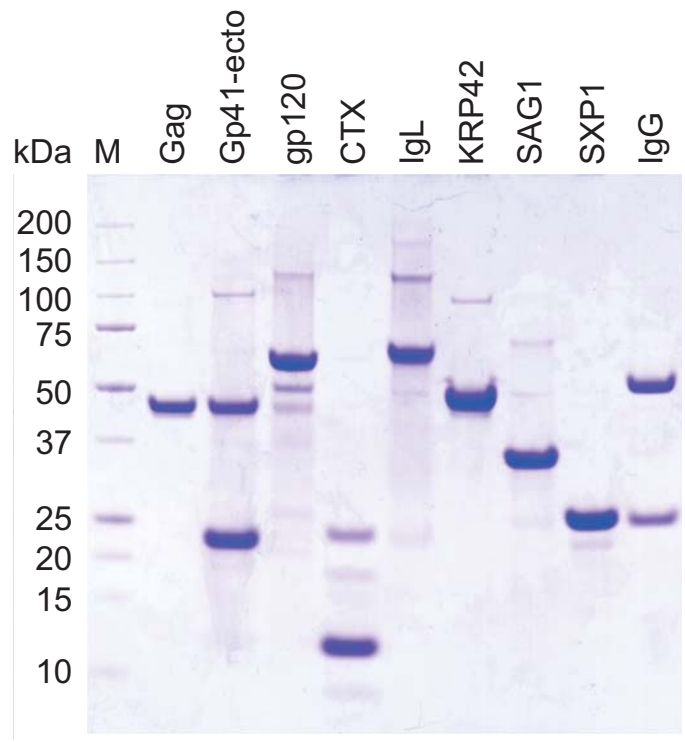

Figure S1. Sodium dodecyl sulfate polyacrylamide gel electrophoresis (SDS-PAGE) analysis of purified antigens
