# Supplementary material for: Serological Surveillance Development for Tropical Infectious Diseases Using Simultaneous Microsphere-Based Multiplex Assays and Finite Mixture Models
Source: PubMed Central journal article supplement (PMC4117437; doi:10.1371/journal.pntd.0003040), 2014-07-31
Supplement: pntd.0003040.s002.pdf [file pntd.0003040.s002.pdf]

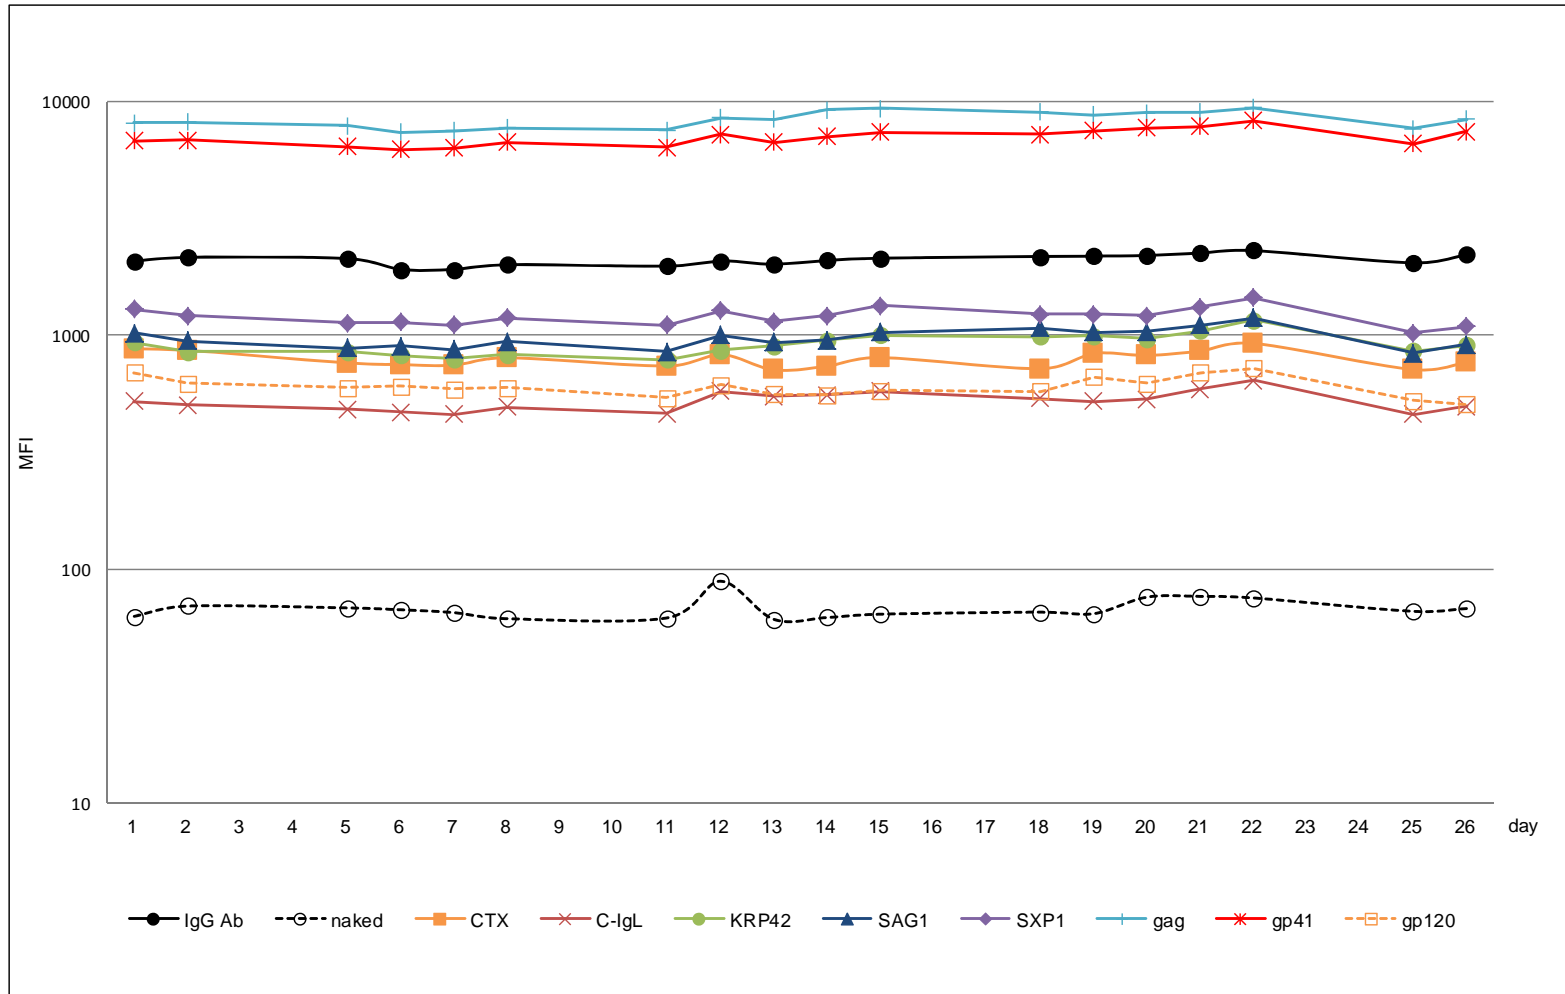

Figure S2. Assay stability after coupling microspheres with antigens

Plotted average median fluorescence intensity (MFI) of mixed positive serums; one to four plates per day assayed during 26 days, but not daily; coupled microspheres with antigens stored at 4°C
