# Supplementary material for: Serological Surveillance Development for Tropical Infectious Diseases Using Simultaneous Microsphere-Based Multiplex Assays and Finite Mixture Models
Source: PubMed Central journal article supplement (PMC4117437; doi:10.1371/journal.pntd.0003040), 2014-07-31
Supplement: pntd.0003040.s003.pdf [file pntd.0003040.s003.pdf]

Table S1. BIC and number of components obtained by finite mixture model

| Pathogen              | Antigen | number of components | AIC<br>(Akaike information criterion) | BIC<br>(Bayesian information criterion) |
|-----------------------|---------|----------------------|---------------------------------------|-----------------------------------------|
| HIV                   | gp41    | 2                    | -2204.037                             | -2173.363                               |
|                       |         | 3                    | -2939.859                             | -2890.781                               |
|                       |         | <b>4</b>             | <b>-3089.633</b>                      | <b>-3022.151</b>                        |
|                       |         | 5                    | -3104.587                             | -3018.701                               |
|                       | gp120   | 2                    | -133.1108                             | -102.437                                |
|                       |         | 3                    | -391.6685                             | -342.5904                               |
|                       |         | <b>4</b>             | <b>-456.9757</b>                      | <b>-389.4933</b>                        |
|                       |         | 5                    | -454.4575                             | -368.5708                               |
|                       | gag     | 2                    | 1585.118                              | 1615.792                                |
|                       |         | 3                    | 954.8943                              | 1003.972                                |
|                       |         | 4                    | 776.1338                              | 843.6162                                |
|                       |         | <b>5</b>             | <b>712.6383</b>                       | <b>798.5249</b>                         |
| 6                     |         | 700.6908             | 804.9817                              |                                         |
| <i>W. bancrofti</i>   | SXP1    | 2                    | 1599.353                              | 1630.027                                |
|                       |         | <b>3</b>             | <b>1552.889</b>                       | <b>1601.967</b>                         |
|                       |         | 4                    | 1537.351                              | 1604.833                                |
| <i>L. donovani</i>    | KRP42   | 2                    | 3353.388                              | 3384.062                                |
|                       |         | <b>3</b>             | <b>3313.9</b>                         | <b>3362.978</b>                         |
|                       |         | 4                    | 3299.853                              | 3367.335                                |
| <i>E. histolytica</i> | C-IgL   | 2                    | 297.1231                              | 327.797                                 |
|                       |         | <b>3</b>             | <b>183.576</b>                        | <b>232.6541</b>                         |
|                       |         | 4                    | 165.3139                              | 232.7962                                |
| Cholera Toxin         | CTX     | <b>2</b>             | <b>-690.5053</b>                      | <b>-659.8315</b>                        |
|                       |         | 3                    | -695.2258                             | -646.1477                               |
| <i>T. gondii</i>      | SAG1    | 2                    | 5242.179                              | 5272.853                                |
|                       |         | 3                    | 4657.758                              | 4706.836                                |
|                       |         | 4                    | 4520.948                              | 4588.43                                 |
|                       |         | <b>5</b>             | <b>4482.768</b>                       | <b>4568.654</b>                         |
|                       |         | 6                    | 4477.132                              | 4581.423                                |
