# Supplementary material for: Serological Surveillance Development for Tropical Infectious Diseases Using Simultaneous Microsphere-Based Multiplex Assays and Finite Mixture Models
Source: PubMed Central journal article supplement (PMC4117437; doi:10.1371/journal.pntd.0003040), 2014-07-31
Supplement: pntd.0003040.s004.pdf [file pntd.0003040.s004.pdf]

Table S2. Sensitivities and specificities in positive and negative controls using cutoff values calculated by the finite mixture model based MFI value distributions in population-based serological survey

| Pathogen              | Antigen | Cutoff value | Positive control |           |                 | Negative control |           |                 | Sensitivity |                 | Specificity |                 |
|-----------------------|---------|--------------|------------------|-----------|-----------------|------------------|-----------|-----------------|-------------|-----------------|-------------|-----------------|
|                       |         |              | Total            | Positives | False negatives | Total            | Positives | False positives | %           | 95%CI           | %           | 95%CI           |
| HIV1                  | gp41    | 1552.4       | 50               | 50        | 0               | 40               | 0         | 0               | 100.0%      | ( 92.9 - 100 )  | 100.0%      | ( 91.2 - 100 )  |
|                       | gag     | 257.0        | 50               | 40        | 10              | 40               | 0         | 0               | 80.0%       | ( 66.3 - 90 )   | 100.0%      | ( 91.2 - 100 )  |
|                       | gp120   | 420.7        | 50               | 36        | 14              | 40               | 0         | 0               | 72.0%       | ( 57.5 - 83.8 ) | 100.0%      | ( 91.2 - 100 )  |
| <i>V. cholerae</i>    | CTX     | 106.9        | 7                | 7         | 0               | 40               | 11        | 11              | 100.0%      | ( 59 - 100 )    | 72.5%       | ( 56.1 - 85.4 ) |
| <i>E. histolytica</i> | C-IgL   | 217.3        | 20               | 20        | 0               | 40               | 0         | 0               | 100.0%      | ( 83.2 - 100 )  | 100.0%      | ( 91.2 - 100 )  |
| <i>L. donovani</i>    | KRP42   | 405.5        | 16               | 15        | 1               | 40               | 0         | 0               | 93.8%       | ( 69.8 - 99.8 ) | 100.0%      | ( 91,2 - 100 )  |
| <i>W. bancrofti</i>   | SXP1*   | 358.9        | 20               | 20        | 0               | 40               | 3         | 3               | 100.0%      | ( 83.2 - 100 )  | 92.5%       | ( 79.6 - 98.4 ) |
| <i>T. gondii</i>      | SAG1    | 608.1        | 19               | 18        | 1               | 40               | 0         | 0               | 94.7%       | ( 74 - 99.9 )   | 100.0%      | ( 91.2 - 100 )  |

\* The cutoff value between the second highest and third highest normal distributions divided by finite mixture mode was used. For others the highest and second highest normal distributions were used for calculating cutoff values.
