# Supplementary material for: Serological Surveillance Development for Tropical Infectious Diseases Using Simultaneous Microsphere-Based Multiplex Assays and Finite Mixture Models
Source: PubMed Central journal article supplement (PMC4117437; doi:10.1371/journal.pntd.0003040), 2014-07-31
Supplement: pntd.0003040.s005.pdf [file pntd.0003040.s005.pdf]

**Table S3. Age and sex specific seropositivities for each pathogen in Kwale site**

| pathogen              | sex    | age 0-4 y/o | age 5-9 y/o | age 10-14 y/o | age 15-19 y/o | age 20-24 y/o | age 25-29 y/o | age 30-34 y/o | age 35-39 y/o | age 40-44 y/o | over 45 y/o | Total |
|-----------------------|--------|-------------|-------------|---------------|---------------|---------------|---------------|---------------|---------------|---------------|-------------|-------|
| HIV                   | female | 0.0%        | 1.2%        | 0.0%          | 1.5%          | 1.7%          | 5.1%          | 6.5%          | 5.1%          | 12.7%         | 3.7%        | 3.7%  |
|                       | male   | 1.1%        | 0.0%        | 1.2%          | 3.9%          | 1.8%          | 0.0%          | 1.9%          | 3.6%          | 6.0%          | 4.2%        | 2.3%  |
| <i>W. bancrofti</i>   | female | 14.3%       | 17.1%       | 4.5%          | 16.7%         | 15.5%         | 22.0%         | 15.6%         | 25.3%         | 27.8%         | 34.6%       | 19.2% |
|                       | male   | 15.7%       | 17.0%       | 14.3%         | 10.5%         | 28.6%         | 18.2%         | 28.8%         | 30.9%         | 43.3%         | 49.3%       | 24.7% |
| <i>L. donovani</i>    | female | 11.0%       | 13.4%       | 9.1%          | 18.2%         | 12.1%         | 5.1%          | 7.8%          | 6.3%          | 15.2%         | 12.3%       | 11.1% |
|                       | male   | 10.1%       | 17.0%       | 11.9%         | 13.2%         | 16.1%         | 18.2%         | 13.5%         | 9.1%          | 14.9%         | 19.7%       | 14.3% |
| <i>E. histolytica</i> | female | 7.7%        | 15.9%       | 14.8%         | 16.7%         | 10.3%         | 10.2%         | 18.2%         | 12.7%         | 8.9%          | 9.9%        | 12.5% |
|                       | male   | 6.7%        | 15.9%       | 14.3%         | 9.2%          | 7.1%          | 21.8%         | 11.5%         | 14.5%         | 11.9%         | 19.7%       | 13.1% |
| <i>V. Cholerae</i>    | female | 72.5%       | 45.1%       | 25.0%         | 18.2%         | 19.0%         | 25.4%         | 19.5%         | 17.7%         | 21.5%         | 19.8%       | 29.6% |
|                       | male   | 76.4%       | 46.6%       | 20.2%         | 23.7%         | 16.1%         | 27.3%         | 21.2%         | 25.5%         | 29.9%         | 31.0%       | 33.9% |
| <i>T. gondii</i>      | female | 3.3%        | 7.3%        | 17.0%         | 30.3%         | 25.9%         | 30.5%         | 41.6%         | 53.2%         | 54.4%         | 59.3%       | 31.8% |
|                       | male   | 2.2%        | 14.8%       | 21.4%         | 21.1%         | 30.4%         | 30.9%         | 28.8%         | 45.5%         | 53.7%         | 67.6%       | 29.9% |
