# Supplementary material for: Serological Surveillance Development for Tropical Infectious Diseases Using Simultaneous Microsphere-Based Multiplex Assays and Finite Mixture Models
Source: PubMed Central journal article supplement (PMC4117437; doi:10.1371/journal.pntd.0003040), 2014-07-31
Supplement: pntd.0003040.s006.pdf [file pntd.0003040.s006.pdf]

Table S4. Age and sex specific seropositivities for each pathogen in Mbita site

| pathogen              | sex    | age 0-4<br>y/o | age 5-9<br>y/o | age 10-<br>14 y/o | age 15-<br>19 y/o | age 20-<br>24 y/o | age 25-<br>29 y/o | age 30-<br>34 y/o | age 35-<br>39 y/o | age 40-<br>44 y/o | over 45<br>y/o | Total |
|-----------------------|--------|----------------|----------------|-------------------|-------------------|-------------------|-------------------|-------------------|-------------------|-------------------|----------------|-------|
| HIV                   | female | 7.8%           | 6.6%           | 2.9%              | 8.1%              | 25.6%             | 34.0%             | 48.5%             | 45.1%             | 39.8%             | 25.0%          | 24.1% |
|                       | male   | 3.1%           | 4.7%           | 4.8%              | 3.0%              | 4.7%              | 17.2%             | 34.8%             | 35.6%             | 35.2%             | 20.7%          | 15.8% |
| <i>W. bancrofti</i>   | female | 16.7%          | 20.8%          | 16.2%             | 16.2%             | 10.5%             | 6.0%              | 11.3%             | 7.8%              | 6.8%              | 13.0%          | 12.6% |
|                       | male   | 17.5%          | 18.7%          | 19.0%             | 15.8%             | 11.8%             | 15.1%             | 13.0%             | 8.0%              | 14.3%             | 9.8%           | 14.5% |
| <i>L. donovani</i>    | female | 19.6%          | 31.1%          | 28.6%             | 21.2%             | 9.3%              | 14.0%             | 15.5%             | 12.7%             | 7.8%              | 11.1%          | 17.3% |
|                       | male   | 23.7%          | 22.4%          | 24.8%             | 11.9%             | 21.2%             | 17.2%             | 8.7%              | 10.3%             | 18.7%             | 13.0%          | 17.4% |
| <i>E. histolytica</i> | female | 22.5%          | 22.6%          | 24.8%             | 18.2%             | 16.3%             | 13.0%             | 13.4%             | 9.8%              | 12.6%             | 18.5%          | 17.3% |
|                       | male   | 21.6%          | 20.6%          | 21.9%             | 18.8%             | 17.6%             | 12.9%             | 17.4%             | 10.3%             | 6.6%              | 8.7%           | 15.9% |
| <i>V. Cholerae</i>    | female | 56.9%          | 32.1%          | 22.9%             | 24.2%             | 19.8%             | 16.0%             | 12.4%             | 19.6%             | 15.5%             | 21.3%          | 24.2% |
|                       | male   | 55.7%          | 32.7%          | 29.5%             | 20.8%             | 27.1%             | 23.7%             | 17.4%             | 13.8%             | 11.0%             | 21.7%          | 25.7% |
| <i>T. gondii</i>      | female | 10.8%          | 14.2%          | 18.1%             | 16.2%             | 36.0%             | 35.0%             | 38.1%             | 36.3%             | 50.5%             | 58.3%          | 31.3% |
|                       | male   | 5.2%           | 15.0%          | 22.9%             | 20.8%             | 20.0%             | 19.4%             | 28.3%             | 32.2%             | 35.2%             | 54.3%          | 24.9% |
